# Supplementary material
Source: PubMed Central journal article supplement (PMC8520413)
Supplement: NIHMS1673836-supplement-1.pdf [file NIHMS1673836-supplement-1.pdf]

## Supplemental Tables

Supplemental Table 1. Exposure Model Parameters

| Parameter                                                              | PAH456 | EC | NO <sub>2</sub> |
|------------------------------------------------------------------------|--------|----|-----------------|
| Central site (Garland) 24-hour concentration                           | X      | X  |                 |
| Fresno fixed site* average 24-hour concentration (n=4)                 |        |    | X               |
| Mean relative humidity for lag days 1-3                                | X      | X  |                 |
| Mean 24-hour temperature on lag day 1                                  | X      |    |                 |
| Mean wind speed for lag days 1-7                                       | X      |    | X               |
| Mean wind speed for lag days 1-5                                       |        | X  |                 |
| Atmospheric stability parameter** for 24-hour period                   |        | X  | X               |
| Atmospheric stability parameter** for lag days 1-4                     | X      |    |                 |
| Distance to nearest freeway                                            |        |    | X               |
| Monthly average Caline4 dispersion model average EC from local traffic |        | X  |                 |
| Area of railyard within 1-km radius buffer                             |        | X  |                 |
| Distance to nearest class 1 rail line                                  | X      | X  |                 |
| Distance to nearest class 3, 4, or 5 rail line                         |        |    | X               |
| Area of urban land use within 1-km radius buffer                       | X      |    |                 |
| Area of open land use within 1-km radius buffer                        |        |    | X               |

\*The Fresno fixed air monitoring sites are Garland, Clovis, Sierra Sky Park, and Fresno-Pacific University.

\*\*The stability parameter is the difference between the 850mb temperature in the 12Z Oakland, CA sounding and the minimum 24-hour Fresno Airport surface temperature, which is a measure of the atmospheric inversion strength.

1 Supplemental Table 2: Pollutant Concentrations

| Pollutant                         | Exposure period                                | N         | Mean  | Median | IQR   |
|-----------------------------------|------------------------------------------------|-----------|-------|--------|-------|
| EC ( $\mu\text{g}/\text{m}^3$ )   | 1-Day Lag                                      | 294       | 0.64  | 0.49   | 0.47  |
|                                   | 1-Week Avg                                     | 294       | 0.67  | 0.58   | 0.37  |
|                                   | 1-Month Avg                                    | 298       | 0.65  | 0.58   | 0.34  |
|                                   | 3-Month Avg                                    | 298       | 0.66  | 0.61   | 0.31  |
|                                   | 6-Month Avg                                    | 295       | 0.68  | 0.64   | 0.23  |
|                                   | 1-year Avg                                     | 287       | 0.69  | 0.70   | 0.12  |
|                                   | NO <sub>2</sub> (ppb)                          | 1-Day Lag | 296   | 6.98   | 5.07  |
| 1-Week Avg                        |                                                | 298       | 7.19  | 6.01   | 6.04  |
| 1-Month Avg                       |                                                | 298       | 7.17  | 6.65   | 6.46  |
| 3-Month Avg                       |                                                | 298       | 7.30  | 6.88   | 6.20  |
| 6-Month Avg                       |                                                | 295       | 7.48  | 7.38   | 3.42  |
| 1-year Avg                        |                                                | 286       | 7.60  | 7.71   | 1.74  |
| PAH456 ( $\text{ng}/\text{m}^3$ ) |                                                | 1-Day Lag | 299   | 9.20   | 7.40  |
|                                   | 1-Week Avg                                     | 274       | 9.31  | 7.41   | 6.99  |
|                                   | 1-Month Avg                                    | 266       | 9.29  | 7.90   | 8.15  |
|                                   | 3-Month Avg                                    | 256       | 9.31  | 8.52   | 7.90  |
|                                   | 6-Month Avg                                    | 258       | 9.23  | 8.82   | 4.42  |
|                                   | 1-year Avg                                     | 287       | 9.24  | 9.36   | 0.71  |
|                                   | PM <sub>2.5</sub> ( $\mu\text{g}/\text{m}^3$ ) | 1-Day Lag | 299   | 13.04  | 10.48 |
| 1-Week Avg                        |                                                | 299       | 13.08 | 11.79  | 7.63  |
| 1-Month Avg                       |                                                | 299       | 12.98 | 11.71  | 7.01  |
| 3-Month Avg                       |                                                | 299       | 13.10 | 13.20  | 6.09  |
| 6-Month Avg                       |                                                | 298       | 13.60 | 13.32  | 3.62  |
| 1-year Avg                        |                                                | 293       | 14.04 | 14.07  | 2.44  |

2  
3

Supplemental Table 3:

a) Outcome Correlations

|                                                       | Leptin | Adiponectin | CA 8-isoprostane | SBP   | DBP   | BMIPCT95 | WHR   | Percent Body Fat |
|-------------------------------------------------------|--------|-------------|------------------|-------|-------|----------|-------|------------------|
| <b>HbA1c</b>                                          | 0.09   | 0.00        | 0.05             | -0.01 | -0.00 | 0.09     | 0.06  | 0.02             |
| <b>Leptin</b>                                         |        | -0.11       | 0.12             | 0.33  | 0.41  | 0.69     | 0.66  | 0.43             |
| <b>Adiponectin</b>                                    |        |             | 0.01             | -0.14 | -0.01 | -0.18    | -0.07 | -0.05            |
| <b>Creatinine-adjusted (CA) 8-isoprostane</b>         |        |             |                  | 0.02  | 0.06  | 0.15     | 0.17  | 0.0              |
| <b>Systolic Blood Pressure (SBP)</b>                  |        |             |                  |       | 0.55  | 0.46     | 0.41  | 0.18             |
| <b>Diastolic Blood Pressure (DBP)</b>                 |        |             |                  |       |       | 0.44     | 0.44  | 0.18             |
| <b>BMI relative to the 95th percentile (BMIPCT95)</b> |        |             |                  |       |       |          | 0.76  | 0.53             |
| <b>Waist-Height Ratio (WHR)</b>                       |        |             |                  |       |       |          |       | 0.44             |

b) Pollutant Correlations

1-Day Lag

|                       | NO <sub>2</sub> | PAH456 | PM <sub>2.5</sub> |
|-----------------------|-----------------|--------|-------------------|
| <b>EC</b>             | 0.76            | 0.63   | 0.78              |
| <b>NO<sub>2</sub></b> |                 | 0.84   | 0.77              |
| <b>PAH456</b>         |                 |        | 0.71              |

1-Week Average

|                       | NO <sub>2</sub> | PAH456 | PM <sub>2.5</sub> |
|-----------------------|-----------------|--------|-------------------|
| <b>EC</b>             | 0.80            | 0.68   | 0.82              |
| <b>NO<sub>2</sub></b> |                 | 0.91   | 0.84              |
| <b>PAH456</b>         |                 |        | 0.83              |

1-Month Average

|                       | NO <sub>2</sub> | PAH456 | PM <sub>2.5</sub> |
|-----------------------|-----------------|--------|-------------------|
| <b>EC</b>             | 0.76            | 0.67   | 0.78              |
| <b>NO<sub>2</sub></b> |                 | 0.92   | 0.83              |
| <b>PAH456</b>         |                 |        | 0.86              |

3-Month Average

|                       | NO <sub>2</sub> | PAH456 | PM <sub>2.5</sub> |
|-----------------------|-----------------|--------|-------------------|
| <b>EC</b>             | 0.78            | 0.72   | 0.80              |
| <b>NO<sub>2</sub></b> |                 | 0.94   | 0.86              |
| <b>PAH456</b>         |                 |        | 0.91              |

6-Month Average

|                       | NO <sub>2</sub> | PAH456 | PM <sub>2.5</sub> |
|-----------------------|-----------------|--------|-------------------|
| <b>EC</b>             | 0.67            | 0.65   | 0.65              |
| <b>NO<sub>2</sub></b> |                 | 0.90   | 0.74              |
| <b>PAH456</b>         |                 |        | 0.84              |

1-year Average

|                       | NO <sub>2</sub> | PAH456 | PM <sub>2.5</sub> |
|-----------------------|-----------------|--------|-------------------|
| <b>EC</b>             | 0.56            | 0.66   | 0.40              |
| <b>NO<sub>2</sub></b> |                 | 0.50   | 0.29              |
| <b>PAH456</b>         |                 |        | 0.34              |

Supplemental Table 4: Associations between the traffic-related air pollutants and longer-term anthropometric measures and biomarkers

|                                        |                 |                                   | Estimated changes in absolute value of outcome |              |                                        |              |                                      |       | Estimated changes in % value of outcome                   |       |                                      |       |                                           |       |
|----------------------------------------|-----------------|-----------------------------------|------------------------------------------------|--------------|----------------------------------------|--------------|--------------------------------------|-------|-----------------------------------------------------------|-------|--------------------------------------|-------|-------------------------------------------|-------|
|                                        |                 |                                   | Estimated change in HbA1c (%)                  |              | Estimated change in Waist-Height Ratio |              | Estimated change in Percent Body Fat |       | Estimated % change in BMI relative to the 95th percentile |       | Estimated % change in Leptin (ng/mL) |       | Estimated % change in Adiponectin (ug/mL) |       |
| Pollutant                              | Exposure Window | IQR for pollutant/exposure window | Effect estimate and 95% CI                     | p            | Point estimate and 95% CI              | p            | Point estimate and 95% CI            | p     | Point estimate and 95% CI                                 | p     | Point estimate and 95% CI            | p     | Point estimate and 95% CI                 | p     |
| EC (µg/m <sup>3</sup> )                | 3-month         | 0.31                              | 0.027<br>(-0.013, 0.067)                       | 0.189        | 0.001<br>(-0.013, 0.016)               | 0.867        | -0.058<br>(-1.714, 1.598)            | 0.945 | 1.620<br>(-2.311, 5.709)                                  | 0.425 | -1.848<br>(-12.658, 10.301)          | 0.754 | 7.358<br>(-7.725, 24.906)                 | 0.359 |
|                                        | 6-month         | 0.23                              | 0.042<br>(0.003, 0.081)                        | <b>0.036</b> | 0.001<br>(-0.014, 0.016)               | 0.880        | 0.212<br>(-1.491, 1.915)             | 0.807 | 2.506<br>(-1.294, 6.452)                                  | 0.200 | -2.564<br>(-14.071, 10.484)          | 0.686 | 9.313<br>(-6.749, 28.140)                 | 0.273 |
|                                        | 1-year          | 0.12                              | -0.012<br>(-0.054, 0.029)                      | 0.560        | 0.004<br>(-0.010, 0.017)               | 0.564        | -0.636<br>(-2.351, 1.078)            | 0.468 | 0.836<br>(-2.551, 4.341)                                  | 0.633 | -2.246<br>(-13.353, 10.284)          | 0.712 | 8.001<br>(-7.323, 25.859)                 | 0.325 |
| NO <sub>2</sub> (ppb)                  | 3-month         | 6.20                              | 0.053<br>(-0.001, 0.108)                       | 0.055        | 0.005<br>(-0.014, 0.024)               | 0.629        | 0.551<br>(-1.770, 2.871)             | 0.642 | 3.485<br>(-1.795, 9.050)                                  | 0.201 | -2.335<br>(-16.815, 14.664)          | 0.773 | 8.827<br>(-12.806, 34.289)                | 0.431 |
|                                        | 6-month         | 3.42                              | 0.044<br>(-0.004, 0.093)                       | 0.074        | 0.005<br>(-0.011, 0.021)               | 0.547        | 0.590<br>(-1.457, 2.637)             | 0.572 | 3.997<br>(-0.188, 8.357)                                  | 0.063 | 1.147<br>(-12.242, 16.578)           | 0.875 | 5.343<br>(-12.582, 26.943)                | 0.585 |
|                                        | 1-year          | 1.74                              | -0.003<br>(-0.050, 0.044)                      | 0.907        | 0.018<br>(0.000, 0.035)                | <b>0.048</b> | 0.401<br>(-1.619, 2.420)             | 0.698 | 1.584<br>(-2.227, 5.543)                                  | 0.421 | 2.994<br>(-10.303, 18.262)           | 0.676 | 0.614<br>(-16.238, 20.857)                | 0.948 |
| PAH456 (ng/m <sup>3</sup> )            | 3-month         | 7.90                              | 0.081<br>(0.018, 0.145)                        | <b>0.013</b> | -0.007<br>(-0.028, 0.015)              | 0.554        | 0.065<br>(-2.772, 2.901)             | 0.964 | 2.879<br>(-3.642, 9.840)                                  | 0.396 | 0.752<br>(-63.172, 175.632)          | 0.988 | 16.982<br>(-9.797, 51.710)                | 0.238 |
|                                        | 6-month         | 4.42                              | 0.073<br>(0.011, 0.136)                        | <b>0.022</b> | -0.003<br>(-0.023, 0.017)              | 0.761        | 0.401<br>(-2.254, 3.056)             | 0.767 | 4.615<br>(-0.671, 10.180)                                 | 0.089 | -2.104<br>(-18.284, 17.278)          | 0.818 | 12.273<br>(-12.119, 43.435)               | 0.355 |
|                                        | 1-year          | 0.71                              | 0.040<br>(-0.003, 0.083)                       | 0.070        | 0.004<br>(-0.012, 0.020)               | 0.613        | 0.682<br>(-1.177, 2.540)             | 0.473 | 0.992<br>(-2.994, 5.142)                                  | 0.631 | -2.258<br>(-15.156, 12.601)          | 0.752 | 1.847<br>(-13.973, 20.577)                | 0.832 |
| PM <sub>2.5</sub> (µg/m <sup>3</sup> ) | 3-month         | 6.09                              | 0.048<br>(0.002, 0.095)                        | <b>0.042</b> | -0.008<br>(-0.036, 0.020)              | 0.575        | 1.262<br>(-1.100, 3.624)             | 0.296 | 1.631<br>(-2.526, 5.965)                                  | 0.448 | -2.074<br>(-14.577, 12.259)          | 0.764 | 8.733<br>(-9.030, 29.965)                 | 0.358 |
|                                        | 6-month         | 3.62                              | 0.055<br>(0.007, 0.102)                        | <b>0.024</b> | -0.002<br>(-0.011, 0.008)              | 0.748        | 0.863<br>(-1.164, 2.891)             | 0.405 | 2.963<br>(-1.087, 7.178)                                  | 0.155 | -2.680<br>(-15.563, 12.169)          | 0.708 | 10.139<br>(-8.459, 32.516)                | 0.307 |
|                                        | 1-year          | 2.44                              | 0.010<br>(-0.080, 0.100)                       | 0.827        | -0.030<br>(-0.060, 0.001)              | 0.057        | 0.589<br>(-3.356, 4.534)             | 0.770 | -4.124<br>(-11.069, 3.365)                                | 0.273 | -17.970<br>(-37.158, 7.076)          | 0.146 | 14.104<br>(-10.936, 62.618)               | 0.466 |

1 Supplemental Table 5: Associations between the traffic-related air pollutants and short- and  
 2 longer-term anthropometric measures and biomarkers

| Pollutant                              | Exposure Window | IQR for pollutant/<br>exposure window | Estimated changes in absolute value of outcome |              |                                |              | Estimated changes in % value of outcome      |                    |
|----------------------------------------|-----------------|---------------------------------------|------------------------------------------------|--------------|--------------------------------|--------------|----------------------------------------------|--------------------|
|                                        |                 |                                       | Estimated change in SBP (mmHg)                 |              | Estimated change in DBP (mmHg) |              | Estimated % change in 8-isoprostane (ng/mg)* |                    |
|                                        |                 |                                       | Point estimate and 95% CI                      | p            | Point estimate and 95% CI      | p            | Point estimate and 95% CI                    | p                  |
| EC (µg/m <sup>3</sup> )                | 1-day           | 0.47                                  | 0.338<br>(-1.167, 1.844)                       | 0.660        | 0.354<br>(-0.662, 1.37)        | 0.495        | 13.129<br>(4.243, 22.773)                    | <b>0.003</b>       |
|                                        | 1-week          | 0.37                                  | 1.279<br>(-0.585, 3.143)                       | 0.180        | 0.983<br>(-0.121, 2.087)       | 0.082        | 9.752<br>(0.732, 19.581)                     | <b>0.034</b>       |
|                                        | 1-month         | 0.34                                  | 2.7<br>(-0.447, 5.847)                         | 0.094        | 1.9<br>(0.379, 3.422)          | <b>0.015</b> | 19.141<br>(7.198, 32.415)                    | <b>0.001</b>       |
|                                        | 3-month         | 0.31                                  | 2.594<br>(-1.475, 6.663)                       | 0.212        | 1.695<br>(-0.114, 3.504)       | 0.067        | 18.449<br>(6.495, 31.745)                    | <b>0.002</b>       |
|                                        | 6-month         | 0.23                                  | 1.163<br>(-2.056, 4.381)                       | 0.479        | 0.493<br>(-1.315, 2.3)         | 0.594        | 3.665<br>(-11.703, 21.707)                   | 0.661              |
|                                        | 1-year          | 0.12                                  | 0.541<br>(-1.321, 2.403)                       | 0.570        | 0.034<br>(-1.382, 1.45)        | 0.963        | 0.321<br>(-10.893, 12.948)                   | 0.958              |
| NO <sub>2</sub> (ppb)                  | 1-day           | 6.42                                  | 0.926<br>(-1.7, 3.552)                         | 0.490        | 0.389<br>(-1.232, 2.01)        | 0.638        | 20.211<br>(7.846, 33.994)                    | <b>0.001</b>       |
|                                        | 1-week          | 6.04                                  | 2.962<br>(-0.617, 6.54)                        | 0.106        | 1.003<br>(-0.643, 2.649)       | 0.234        | 17.200<br>(4.676, 31.222)                    | <b>0.006</b>       |
|                                        | 1-month         | 6.46                                  | 5.61<br>(0.022, 11.198)                        | <b>0.050</b> | 1.646<br>(-0.434, 3.726)       | 0.122        | 25.526<br>(9.376, 44.060)                    | <b>0.001</b>       |
|                                        | 3-month         | 6.20                                  | 9.387<br>(2.842, 15.932)                       | <b>0.005</b> | 1.866<br>(-1.087, 4.819)       | 0.217        | 12.401<br>(-9.732, 39.961)                   | 0.297              |
|                                        | 6-month         | 3.42                                  | 4.689<br>(0.853, 8.524)                        | <b>0.017</b> | 0.148<br>(-2.008, 2.304)       | 0.893        | -7.724<br>(-22.483, 9.844)                   | 0.367              |
|                                        | 1-year          | 1.74                                  | 2.613<br>(0.652, 4.573)                        | <b>0.010</b> | 0.349<br>(-1.178, 1.876)       | 0.655        | 0.127<br>(-11.987, 13.908)                   | 0.985              |
| PAH456 (ng/m <sup>3</sup> )            | 1-day           | 6.14                                  | 2.205<br>(-1.17, 5.579)                        | 0.202        | 1.249<br>(-0.242, 2.74)        | 0.102        | 25.207<br>(12.557, 39.279)                   | <b>&lt;0.00001</b> |
|                                        | 1-week          | 6.99                                  | 2.688<br>(-2.167, 7.543)                       | 0.279        | 1.604<br>(-0.194, 3.402)       | 0.082        | 24.280<br>(9.817, 40.647)                    | <b>0.001</b>       |
|                                        | 1-month         | 8.15                                  | 4.16<br>(-2.591, 10.911)                       | 0.228        | 1.712<br>(-0.499, 3.924)       | 0.130        | 29.586<br>(10.834, 51.510)                   | <b>0.001</b>       |
|                                        | 3-month         | 7.90                                  | 2.194<br>(-8.417, 12.805)                      | 0.686        | 0.828<br>(-3.724, 5.38)        | 0.722        | 2.968<br>(-27.876, 47.003)                   | 0.872              |
|                                        | 6-month         | 4.42                                  | 0.406<br>(-8.429, 9.241)                       | 0.928        | -1.624<br>(-3.712, 0.463)      | 0.128        | -13.542<br>(-40.721, 26.100)                 | 0.451              |
|                                        | 1-year          | 0.71                                  | 0.86<br>(-1.362, 3.081)                        | 0.449        | -0.081<br>(-1.759, 1.596)      | 0.924        | -6.255<br>(18.626, 7.997)                    | 0.372              |
| PM <sub>2.5</sub> (µg/m <sup>3</sup> ) | 1-day           | 8.47                                  | 1.159<br>(-0.37, 2.688)                        | 0.138        | 0.511<br>(-0.507, 1.529)       | 0.326        | 11.312<br>(2.381, 21.002)                    | <b>0.013</b>       |
|                                        | 1-week          | 7.63                                  | 1.778<br>(-0.433, 3.988)                       | 0.116        | 1.069<br>(-0.166, 2.304)       | 0.091        | 13.999<br>(3.452, 25.621)                    | <b>0.009</b>       |
|                                        | 1-month         | 7.01                                  | 2.597<br>(-1.056, 6.25)                        | 0.165        | 1.448<br>(-0.155, 3.051)       | 0.078        | 22.273<br>(8.340, 37.998)                    | <b>0.001</b>       |
|                                        | 3-month         | 6.09                                  | 3.864<br>(-1.495, 9.224)                       | 0.159        | 0.904<br>(-1.154, 2.961)       | 0.390        | 9.140<br>(-10.032, 32.398)                   | 0.376              |
|                                        | 6-month         | 3.62                                  | -1.665<br>(-6.33, 3.001)                       | 0.485        | -0.359<br>(-2.491, 1.772)      | 0.741        | -7.235<br>(-22.413, 10.912)                  | 0.411              |
|                                        | 1-year          | 2.44                                  | -0.831<br>(-5.03, 3.367)                       | 0.698        | -1.284<br>(-4.336, 1.769)      | 0.411        | 2.076<br>(-21.85, 32.371)                    | 0.877              |

3 \*8-isoprostane is adjusted for creatinine level

4 Supplemental Figure 1. DAG used for determining the covariates to be adjusted in the  
5 model

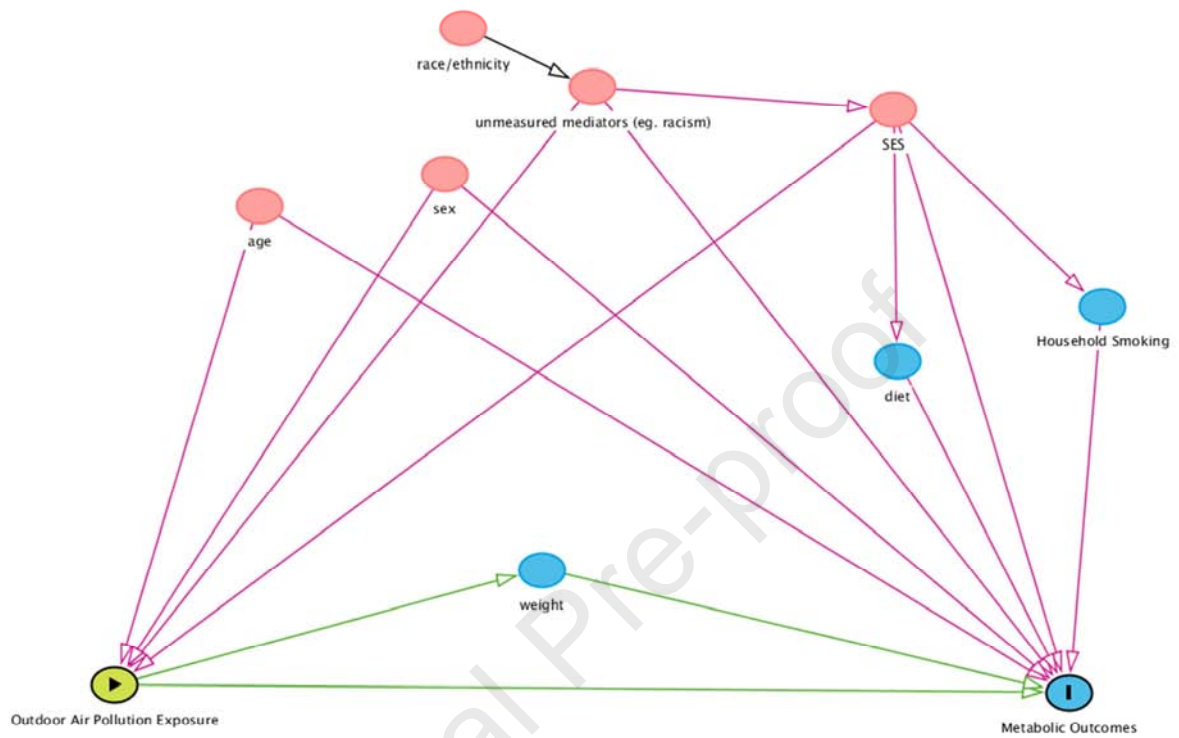

6

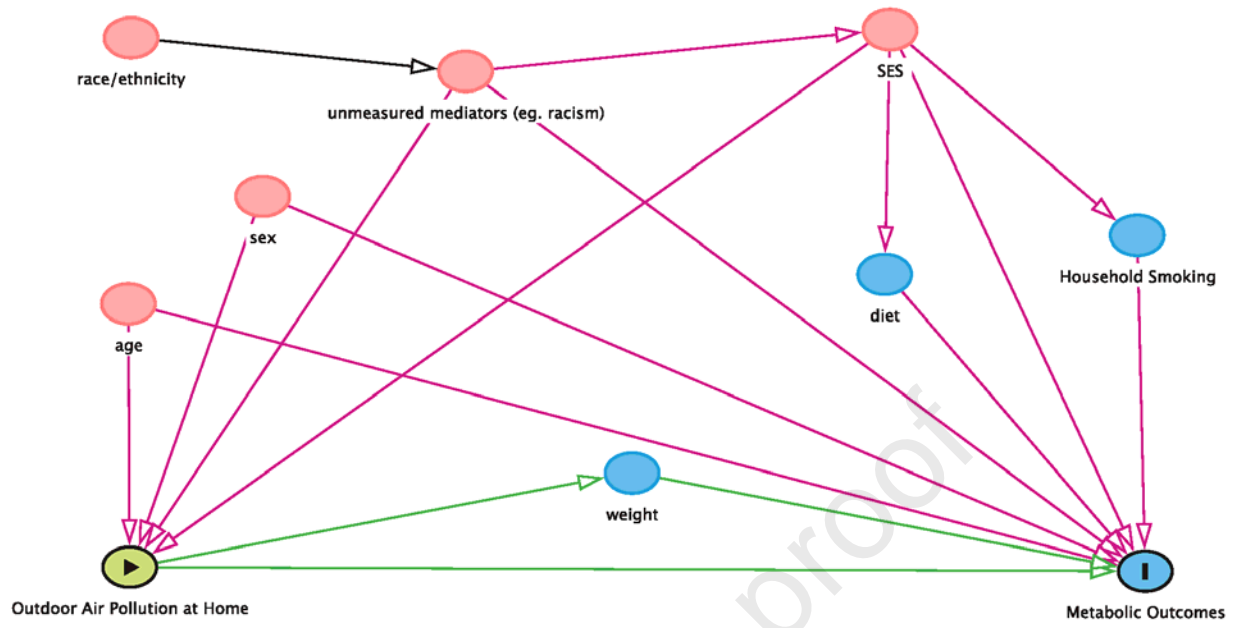

Journal Pre-proof
